# Supplementary material
Source: PubMed Central journal article supplement (PMC7256969)

Appendix Exhibit 1. CONSORT Diagram for hypertension management study.

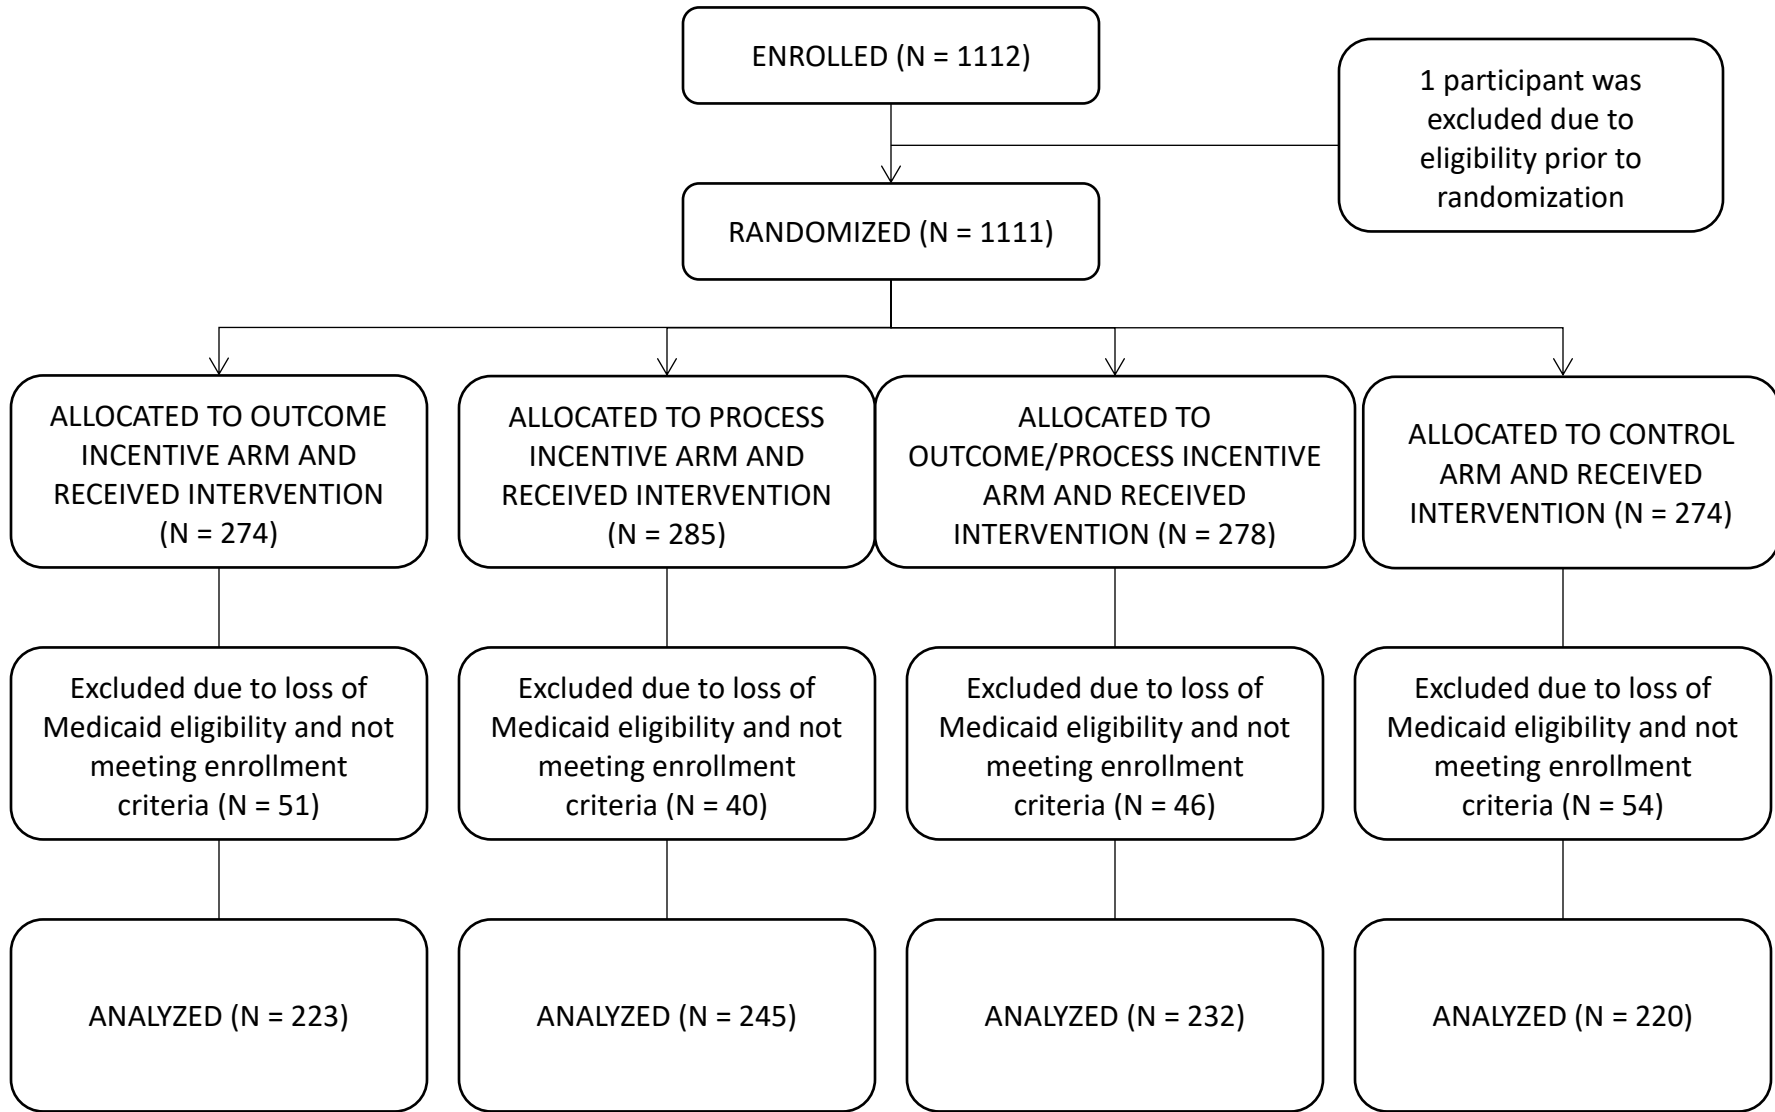

Appendix Exhibit 2. CONSORT Diagram for diabetes management study.

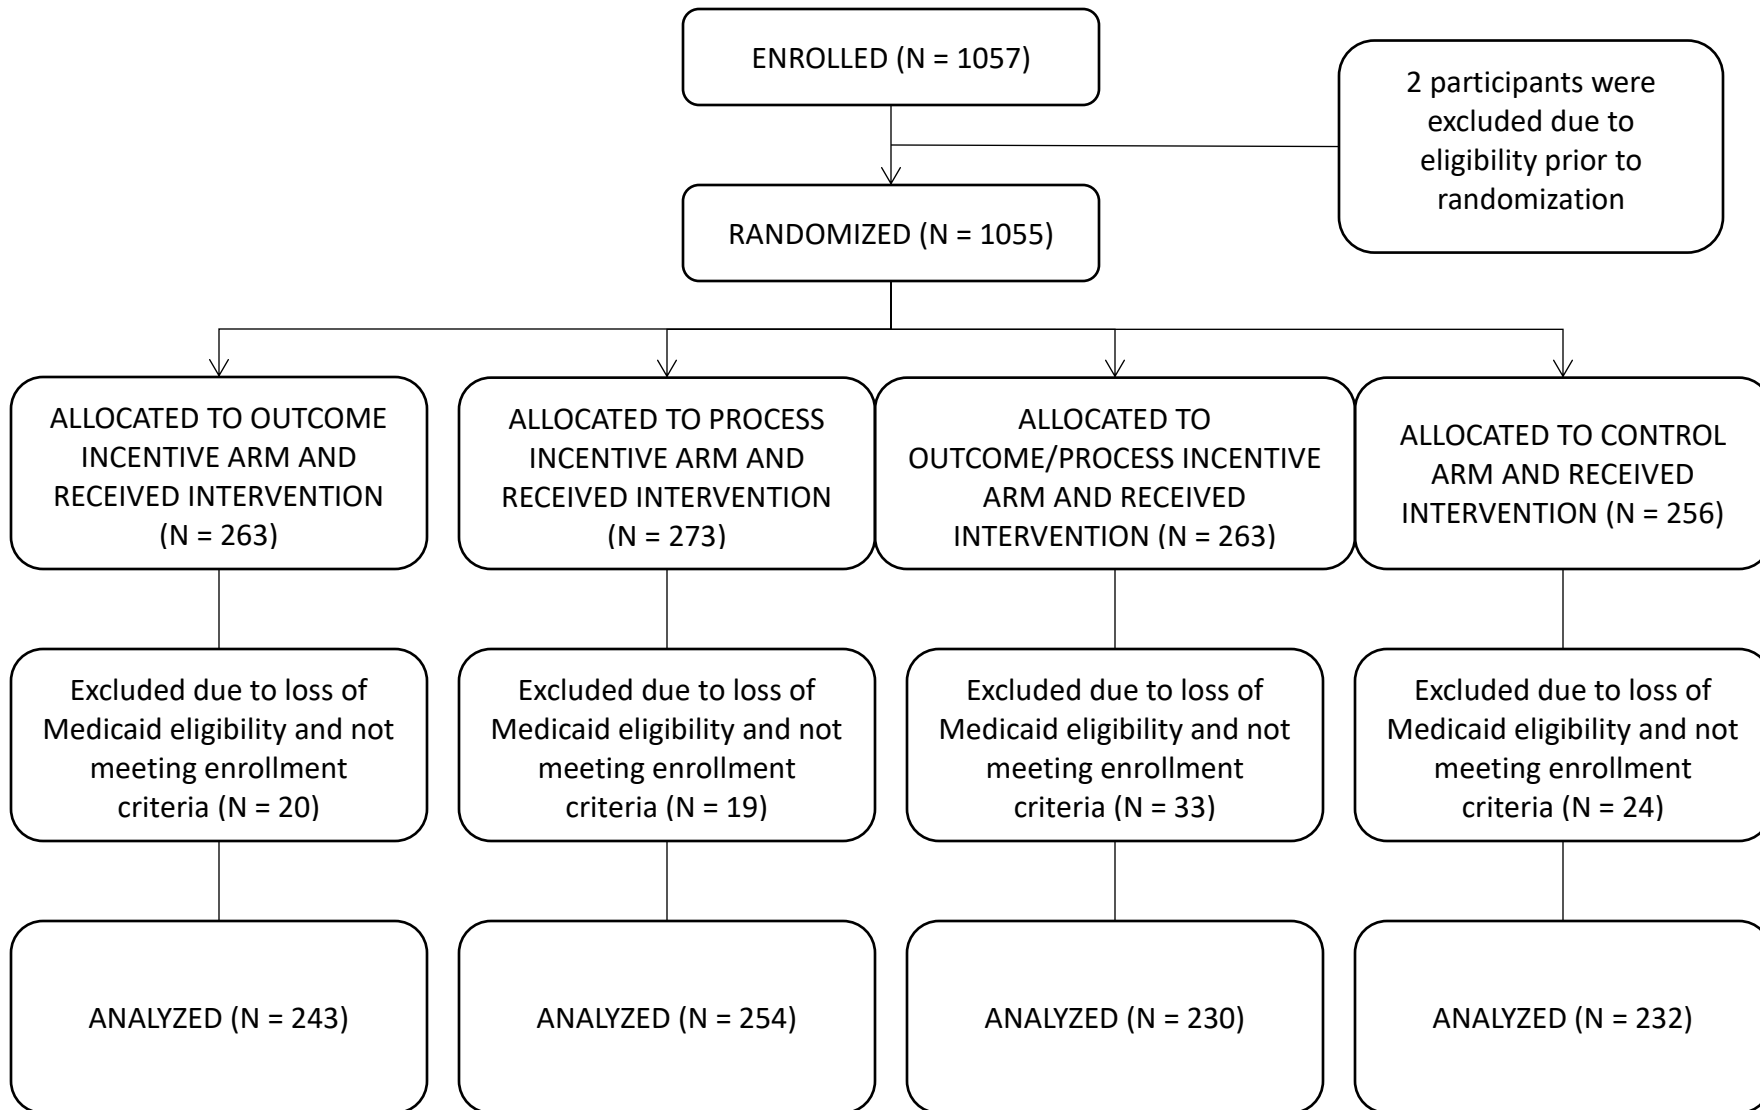

Supplement: NIHMS987807-supplement-2.pdf [file NIHMS987807-supplement-2.pdf]
